# Supplementary material
Source: publisher site journal article supplement (https://www.spandidos-publications.com/2514/downloadSupplementary)

Figure S1. Hsa-miR-34a inhibits MMP-2 expression through direct binding. (A) The 5637 and UMUC3 cells were transfected with NC mimic (100 nM) and miR-34a mimic (100 nM) for 24 h. The levels of miR-34a expression were measured by RT-qPCR assay. (B) The basal levels of MMP2 protein expression in SVHUC1, T24, UMUC3 and 5637 cells were measured by Western blot assay. (C) The UMUC3 stable cells were transfected with miR-34a inhibitor (100 nM) for 24 h and MMP2 protein expression was detected by Western blot assay. (D) The UMUC3 cells were transfected with NC inhibitor (100 nM) and miR-34a inhibitor (100 nM) for 24 h and RT-qPCR assay was used to measure miR-34a expression. All data are expressed as the mean  $\pm$  SD of triplicate samples. \*\* $P$ <0.01, \*\*\* $P$ <0.001 compared with the control group.

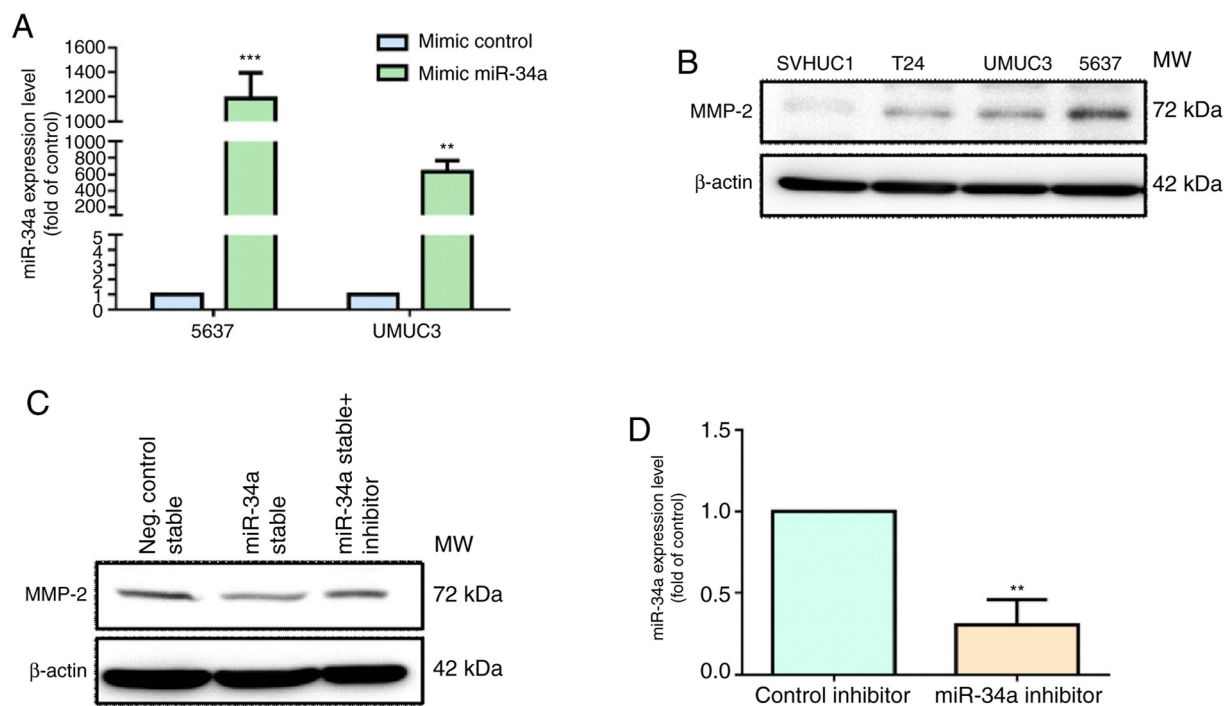

Supplement: Supplementary file 1 [file downloadSupplementary]
